# Supplementary material for: The formation of yolk–shell structured NiO nanospheres with enhanced lithium storage capacity
Source: Royal Society of Chemistry journal article supplement (doi:10.1039/c9qm00328b), 2019-01-01
Supplement: c9qm00328b1.pdf [file c9qm00328b1.pdf]

## **Electronic Supplementary Information (ESI)**

### **Formation of Yolk-shell Structured NiO Nanospheres with Enhanced Lithium Storage Capacity**

Jian Wang,<sup>a,+</sup> Panpan Su,<sup>b,+</sup> Jing Zhang,<sup>a,\*</sup> Fangfang Wang,<sup>a</sup> Yali Chen,<sup>c</sup> Hao Liu,<sup>c,d,\*</sup> and

Jian Liu<sup>b,e,\*</sup>

<sup>a</sup> School of Chemistry and Materials Science, Liaoning Shihua University, No.1 West Dandong Road, Wanghua District, Fushun 113001, China. [zhangjing@lnpu.edu.cn](mailto:zhangjing@lnpu.edu.cn)

<sup>b</sup> Dalian Institute of Chemical Physics, Chinese Academy of Sciences, Zhongshan Road 457, Dalian 116023, China. [jian.liu@surrey.ac.uk](mailto:jian.liu@surrey.ac.uk)

<sup>c</sup> Joint International Laboratory on Environmental and Energy Frontier Materials, School of Environmental and Chemical Engineering, Shanghai University, Shanghai, 200444, China. [haoliu@shu.edu.cn](mailto:haoliu@shu.edu.cn)

<sup>d</sup> Centre for Clean Energy Technology, School of Mathematical and Physical Sciences, Faculty of Science, University of Technology Sydney, Broadway, Sydney, NSW 2007, Australia. [haoliu@shu.edu.cn](mailto:haoliu@shu.edu.cn)

<sup>e</sup> DICP-Surrey Joint Centre for Future Materials, Department of Chemical and Process Engineering, and Advanced Technology Institute, University of Surrey, Guilford, Surrey, GU2 7XH, UK. [jian.liu@surrey.ac.uk](mailto:jian.liu@surrey.ac.uk)

<sup>+</sup> these authors contributed equally to this work.

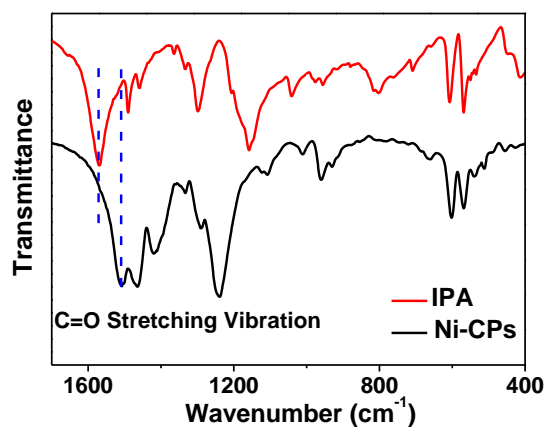

Fig.S1 FTIR spectra of Ni-CPs and isophthalic acid (IPA).

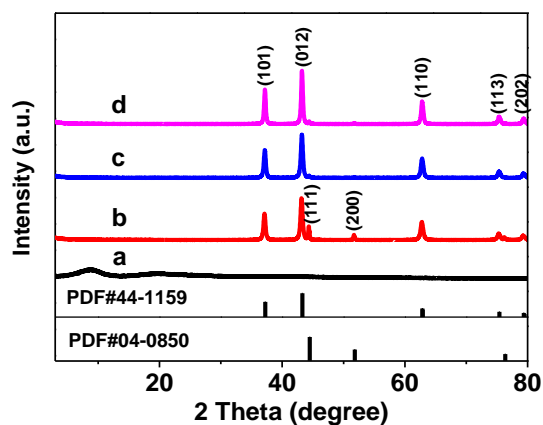

Fig.S2 XRD patterns for (a) Ni-CPs, (b) NiO-10, (c) NiO-60 and (d) NiO-360.

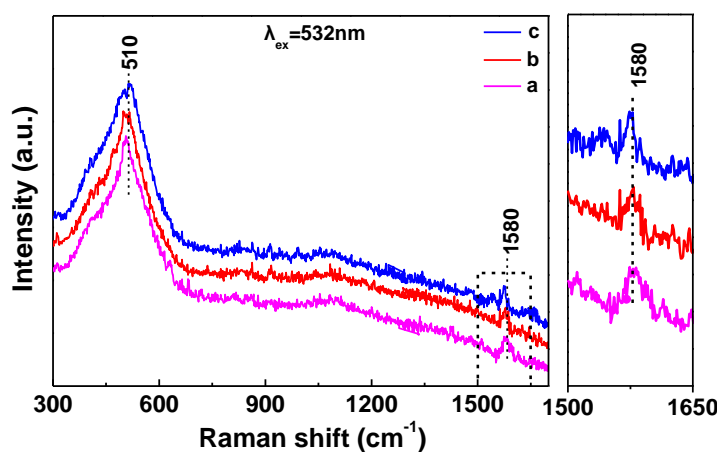

Fig.S3 Raman spectra of (a) NiO-10, (b) NiO-60 and (c) NiO-360.

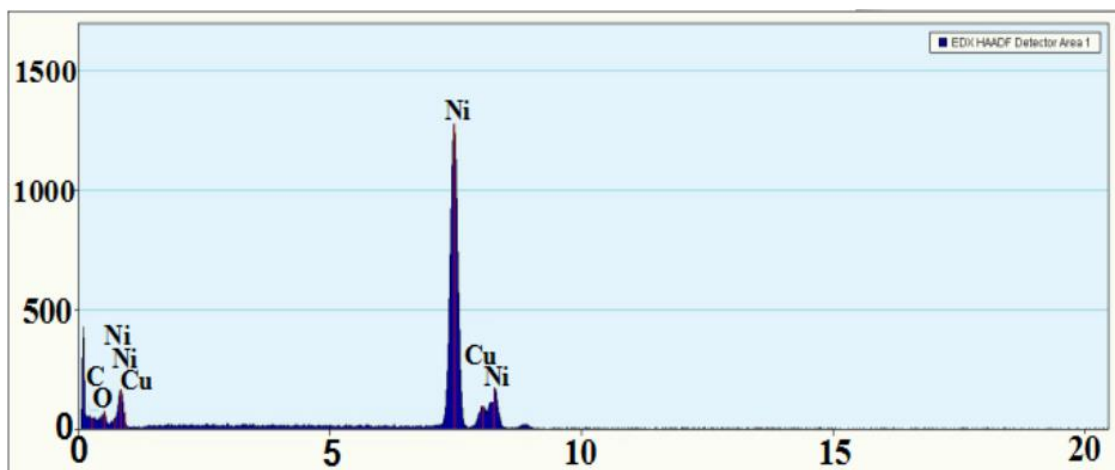

Fig.S4 HRTEM-EDS image of yolk-shell NiO-30.

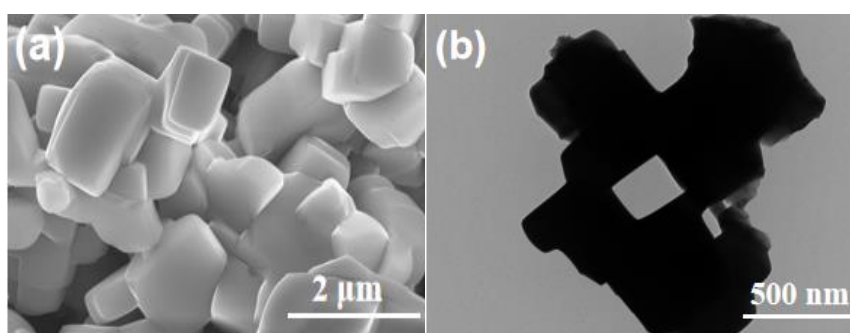

Fig.S5 SEM image and TEM image of commercial NiO.

**Table S1 Specific surface area and average pore diameter of all NiO samples.**

| Sample  | Specific surface area ( $\text{m}^2/\text{g}$ ) | Average pore size (nm) |
|---------|-------------------------------------------------|------------------------|
| NiO-10  | 22                                              | 10                     |
| NiO-30  | 18                                              | 13                     |
| NiO-60  | 13                                              | 17                     |
| NiO-360 | 9                                               | 19                     |

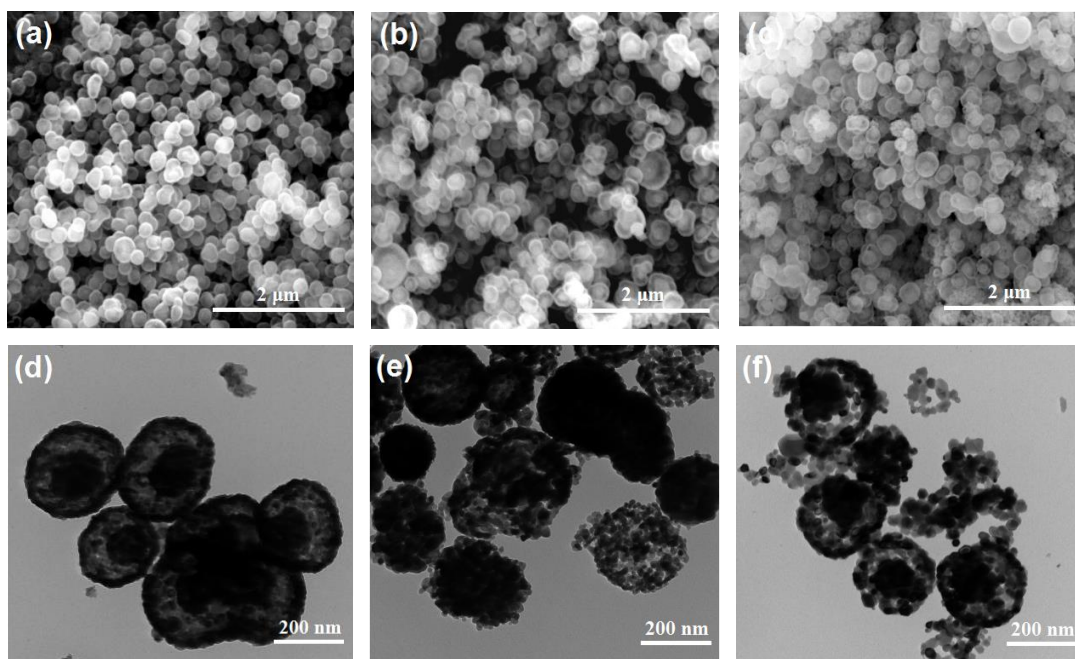

Fig.S6 SEM images and TEM images of the Ni-CPs calcinated at the temperature of 500 °C for different time:(a, d) NiO-10, (b, e) NiO-60, (c, f) NiO-360.

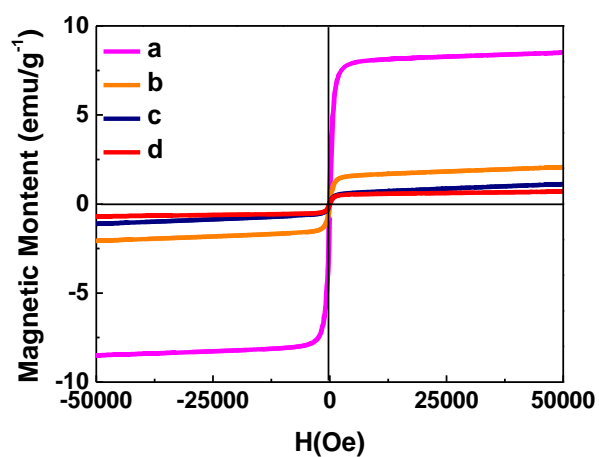

Fig.S7 Magnetization (M) versus magnetic field (H) of the Ni-CPs calcinated at the temperature of 500 °C for different time at 300 K: (a) NiO-10, (b) NiO-30, (c) NiO-60 and (d) NiO-360.

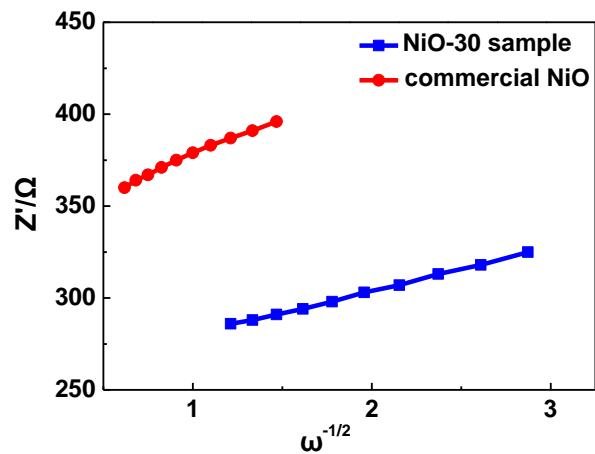

Fig.S8 The lines of  $Z''-\omega^{-1/2}$  of NiO-30 and commercial NiO.

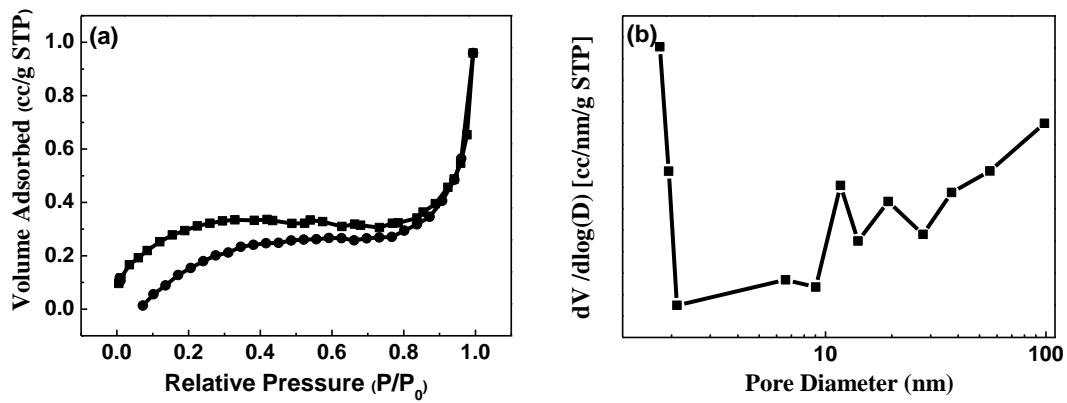

Fig.S9 (a)  $N_2$  adsorption-desorption isotherms and (b) the pore size distribution curves of commercial NiO.
